# Supplementary material for: The Basic Cardiovascular Responses to Postural Changes, Exercise, and Cold Pressor Test: Do They Vary in Accordance with the Dual Constitutional Types of Ayurveda?
Source: Hindawi journal article supplement (doi:10.1155/2011/251850), 2010-08-30
Supplement: f1 [file 251850.f1.pdf]

**The self-assessment questionnaire to assess Prakriti\***

| Sl. No.      | Question/statement                                                                                                                  | Guna             | Is your answer the following? | Scores to be allotted if your answer is the one that is mentioned in the previous column | Allot the Scores in this column |
|--------------|-------------------------------------------------------------------------------------------------------------------------------------|------------------|-------------------------------|------------------------------------------------------------------------------------------|---------------------------------|
| <b>KAPHA</b> |                                                                                                                                     |                  |                               |                                                                                          |                                 |
| 1.           | Whether your skin remains oily throughout the year in comparison to others?                                                         | <i>Snigdha</i>   | Yes                           | 120                                                                                      |                                 |
| 2.           | Are your body-hairs & skin shiny, even when no oil or moisturizer is used?                                                          | <i>Shlakshna</i> | Yes                           | 120                                                                                      |                                 |
| 3.A.         | Are you considered attractive among your friends?                                                                                   | <i>Mridu</i>     | Yes                           | 40                                                                                       |                                 |
| 3.B.         | Do even mild or trivial injuries on your body make you upset?                                                                       | <i>Mridu</i>     | Yes                           | 40                                                                                       |                                 |
| 3.C.         | Among your family members, is your complexion considered fairer?                                                                    | <i>Mridu</i>     | Yes                           | 40                                                                                       |                                 |
| 4.           | Do you think you have intense sexual desire?                                                                                        | <i>Madhura</i>   | Yes                           | 120                                                                                      |                                 |
| 5.A.         | Have you got well built muscles?                                                                                                    | <i>Saara</i>     | Yes                           | 60                                                                                       |                                 |
| 5.B.         | Do you change your body posture frequently? (You cannot manage yourself in a stable posture for a long duration.)                   | <i>Saara</i>     | No                            | 60                                                                                       |                                 |
| 6.           | Do you have a well-nourished & normally developed body? (You are neither malnourished nor obese.)                                   | <i>Sandra</i>    | Yes                           | 120                                                                                      |                                 |
| 7.A.         | Are you lazy and disinterested in activities like morning walk/ jogging, swimming or any type of outdoor games?                     | <i>Manda</i>     | Yes                           | 40                                                                                       |                                 |
| 7.B.         | Are you slow in consuming the food?<br>(Even after all have left the dining hall, you are still consuming the same amount of food). | <i>Manda</i>     | Yes                           | 40                                                                                       |                                 |

|              |                                                                                                                                                                                                                          |                 |     |             |               |
|--------------|--------------------------------------------------------------------------------------------------------------------------------------------------------------------------------------------------------------------------|-----------------|-----|-------------|---------------|
| 7.C.         | When you go to morning walk or college or office, do you walk slowly in comparison to others?                                                                                                                            | <i>Manda</i>    | Yes | 40          |               |
| 8.A.         | If you are assigned any work, do you take some extra time to start it?                                                                                                                                                   | <i>Stimita</i>  | Yes | 40          |               |
| 8.B.         | Do you get irritated easily? (For example, when you don't get breakfast on time in your hostel or when the power goes off while watching a cricket match or your favourite movie on television).                         | <i>Stimita</i>  | No  | 40          |               |
| 8.C.         | Are you late to develop/suffer from symptoms after exposure to common causative factors? (For example, during seasonal changes, when your friends are easily caught up with flu etc., you are still healthy among them). | <i>Stimita</i>  | Yes | 40          |               |
| 9.           | Does your gait (style of walking) change with respect to speed or manner frequently?                                                                                                                                     | <i>Guru</i>     | No  | 120         |               |
| 10.A.        | Do you feel hungry more frequently and do you consume more food in comparison to others?                                                                                                                                 | <i>Shita</i>    | No  | 30          |               |
| 10.B.        | Do you tolerate heat easily?                                                                                                                                                                                             | <i>Shita</i>    | Yes | 30          |               |
| 10.C.        | Do you consume liquids in more quantity and frequency in comparison to others?                                                                                                                                           | <i>Shita</i>    | No  | 30          |               |
| 10.D.        | Do you perspire less in comparison to others?                                                                                                                                                                            | <i>Shita</i>    | Yes | 30          |               |
| 11.          | Are sounds produced frequently in your joints on movement?                                                                                                                                                               | <i>Picchila</i> | No  | 120         |               |
| 12.A.        | Have you got a good/ attractive complexion?                                                                                                                                                                              | <i>Achcha</i>   | Yes | 60          |               |
| 12.B.        | Have you got sweet & pleasant voice?                                                                                                                                                                                     | <i>Achcha</i>   | Yes | 60          |               |
|              |                                                                                                                                                                                                                          |                 |     | <b>1440</b> | <b>Total=</b> |
| <b>PITTA</b> |                                                                                                                                                                                                                          |                 |     |             |               |
| 1.A.         | Are you more comfortable in winter than summer?                                                                                                                                                                          | <i>Ushna</i>    | Yes | 17          |               |

|      |                                                                                                                                           |                |     |    |  |
|------|-------------------------------------------------------------------------------------------------------------------------------------------|----------------|-----|----|--|
| 1.B. | Among your family members, is your complexion considered fairer?                                                                          | <i>Ushna</i>   | Yes | 17 |  |
| 1.C. | Does your temperature of oral cavity remain towards upper limit of normal range?                                                          | <i>Ushna</i>   | Yes | 17 |  |
| 1.D. | Do you have excessive black moles, Freckles etc on your skin?<br>Or<br>Have you noticed new appearance of black moles often on your skin? | <i>Ushna</i>   | Yes | 17 |  |
| 1.E. | Do you feel excessive hunger & thirst in comparison to others?                                                                            | <i>Ushna</i>   | Yes | 17 |  |
| 1.F. | Have you experienced premature graying, wrinkling of skin & early baldness?                                                               | <i>Ushna</i>   | Yes | 17 |  |
| 1.G. | Do you have soft, scanty, brown hair on your face, body & head?                                                                           | <i>Ushna</i>   | Yes | 17 |  |
| 2.A. | Do you involve yourself in risky & heroic activities requiring physical strength often?                                                   | <i>Tikshna</i> | Yes | 24 |  |
| 2.B. | Do you have ability to digest large quantities of food easily?                                                                            | <i>Tikshna</i> | Yes | 24 |  |
| 2.C. | Do you take large quantities of food & drink in comparison to others?                                                                     | <i>Tikshna</i> | Yes | 24 |  |
| 2.D. | Do you get easily irritated for small/negligible problem in day-to-day life?                                                              | <i>Tikshna</i> | Yes | 24 |  |
| 2.E. | Do you consume food more frequently than others? (5-6 times/day)                                                                          | <i>Tikshna</i> | Yes | 24 |  |
| 3.A. | Do you have soft & loose muscle bulk especially around the joints?                                                                        | <i>Drava</i>   | Yes | 60 |  |
| 3.B. | In comparison to others do you pass urine & stool in large quantities and do you perspire more?                                           | <i>Drava</i>   | Yes | 60 |  |

|             |                                                                                                                                                            |                       |     |            |               |
|-------------|------------------------------------------------------------------------------------------------------------------------------------------------------------|-----------------------|-----|------------|---------------|
| 4.          | Do your friends complain of bad smell being emitted from your body & mouth?                                                                                | <i>Visra</i>          | Yes | 120        |               |
| 5.          | Do you think you have intense sexual desire?                                                                                                               | <i>Amla+<br/>Katu</i> | No  | 120        |               |
|             |                                                                                                                                                            |                       |     | <b>600</b> | <b>Total=</b> |
| <b>VATA</b> |                                                                                                                                                            |                       |     |            |               |
| 1.A.        | Whether your skin remains dry throughout the year in comparison to others?                                                                                 | <i>Ruksha</i>         | Yes | 30         |               |
| 1.B.        | Is your body undernourished/ emaciated?                                                                                                                    | <i>Ruksha</i>         | Yes | 30         |               |
| 1.C.        | Have you got rough, low, broken or obstructed voice?                                                                                                       | <i>Ruksha</i>         | Yes | 30         |               |
| 1.D.        | Does Your sleep last less than 6 hours per day? Or Can your sleep be disturbed easily?                                                                     | <i>Ruksha</i>         | Yes | 30         |               |
| 2.A.        | Do you change walking speed & style from time to time?                                                                                                     | <i>Laghu</i>          | Yes | 40         |               |
| 2.B.        | Do you keep changing your food habits from time to time?                                                                                                   | <i>Laghu</i>          | Yes | 40         |               |
| 2.C.        | Do you keep changing your walking / jogging habit from time to time?                                                                                       | <i>Laghu</i>          | Yes | 40         |               |
| 3.          | Do you keep your joints, eyes, eyebrows, jaw, lips, tongue, head, Shoulder, hands & feet frequently moving?                                                | <i>Chala</i>          | Yes | 120        |               |
| 4.A.        | Are you considered a talkative among your friends?                                                                                                         | <i>Bahu</i>           | Yes | 60         |               |
| 4.B.        | Do you have prominent veins & tendons all over the body?                                                                                                   | <i>Bahu</i>           | Yes | 60         |               |
| 5.A.        | Do you generally start the work assigned to you immediately?                                                                                               | <i>Shighra</i>        | Yes | 15         |               |
| 5.B.        | Do you get irritated easily? (E.g., when you do not get breakfast on time in your hostel or when the power goes off while watching a cricket match or your | <i>Shighra</i>        | Yes | 15         |               |

|      |                                                                                                                                                                         |                |     |            |               |
|------|-------------------------------------------------------------------------------------------------------------------------------------------------------------------------|----------------|-----|------------|---------------|
|      | favourite movie over television)                                                                                                                                        |                |     |            |               |
| 5.C. | Do you get frightened easily?                                                                                                                                           | <i>Shighra</i> | Yes | 15         |               |
| 5.D. | Do you make friends easily & also lose them easily?                                                                                                                     | <i>Shighra</i> | Yes | 15         |               |
| 5.E. | Do you generally learn things quickly?<br>Or<br>Do you have a good grasping power?                                                                                      | <i>Shighra</i> | Yes | 15         |               |
| 5.F. | Is your long term memory weak? (E.g., you can remember only few names of your friends at your primary school).                                                          | <i>Shighra</i> | Yes | 15         |               |
| 5.G. | Are you more comfortable in summer?<br>Or<br>Do you prefer hot/warm drinks over cold drinks?                                                                            | <i>Shighra</i> | Yes | 15         |               |
| 5.H. | Do you generally develop symptoms immediately after exposure to common causative factors?(You are easily caught by diseases like flu, allergy during seasonal changes). | <i>Shighra</i> | Yes | 15         |               |
| 6.A. | Do you shiver in winter season more than your friends?                                                                                                                  | <i>Shita</i>   | Yes | 60         |               |
| 6.B. | Do you often feel stiffness in your body after exercise, travelling?                                                                                                    | <i>Shita</i>   | Yes | 60         |               |
| 7.   | Are your nails, teeth, hands, feet and hairs on your body and face rough?                                                                                               | <i>Parusha</i> | Yes | 120        |               |
| 8.A. | Do you have cracks on the body especially on the heels?                                                                                                                 | <i>Vishada</i> | Yes | 60         |               |
| 8.B. | Are some crackling sounds produced in your joints during movements?                                                                                                     | <i>Vishada</i> | Yes | 60         |               |
|      |                                                                                                                                                                         |                |     | <b>960</b> | <b>Total=</b> |

$$\frac{\text{Total scores scored by an individual for a Dosha}}{\text{Total scores allotted to that Dosha}} \times 100$$

**Final percentage scores for Vata =**

**Final percentage scores for Pitta =**

**Final percentage scores for Kapha =**

\*Originally prepared by: **Kishor Patwardhan** and **Rashmi Sharma**. Modified by: **Piyush Kumar Tripathi, Kishor Patwardhan** and **Girish Singh**, Institute of Medical Sciences, Banaras Hindu University, Varanasi.
